# Supplementary material for: Factors influencing the implementation of person-centred care in nursing homes by practice development champions: a qualitative process evaluation of a cluster-randomised controlled trial (EPCentCare) using Normalization Process Theory
Source: PubMed Central journal article supplement (PMC9264574; doi:10.1186/s12912-022-00963-6), 2022-07-08
Supplement: 12912_2022_963_MOESM1_ESM.pdf [file 12912_2022_963_MOESM1_ESM.pdf]

Additional file 1: Matrix with the definitions for mapping the identified influencing factors to the NPT constructs

| NPT construct and the specific components * |                                                                                                   | Definitions for mapping                                                                                                                                                                                                |
|---------------------------------------------|---------------------------------------------------------------------------------------------------|------------------------------------------------------------------------------------------------------------------------------------------------------------------------------------------------------------------------|
|                                             |                                                                                                   | Meaning: Encompasses statements that ...                                                                                                                                                                               |
| <b>Coherence</b>                            | 1. Participants distinguish the intervention from current ways of working                         | ... describe perceptions of differences between own (EPA's) practice and new practice OR lack thereof                                                                                                                  |
|                                             | 2. Participants collectively agree about the purpose of the intervention                          | ... relate to a shared agreement of all professions regarding aims, objectives, and intention of interventions OR lack thereof                                                                                         |
|                                             | 3. Participants individually understand what the intervention requires of them                    | ... show EPA's understanding of the concept of PCC OR lack thereof<br>... include perception of relevant practice changes to adopt PCC OR lack thereof                                                                 |
|                                             | 4. Participants construct potential value of the intervention for their work                      | ... describe EPA's sense-making process to attribute value and worth to PCC for themselves OR lack thereof                                                                                                             |
| <b>Cognitive participation</b>              | 5. Key individuals drive the intervention forward                                                 | ... relate to involvement of other relevant stakeholders like nursing management, physicians, relatives, social workers etc. OR lack thereof                                                                           |
|                                             | 6. Participants agree that the intervention should be part of their work                          | ... demonstrate EPA's agreement to incorporate PCC into their daily practice OR lack thereof                                                                                                                           |
|                                             | 7. Participants buy into the intervention                                                         | ... show EPA's conviction that PCC can be implemented in daily practice OR lack thereof                                                                                                                                |
|                                             | 8. Participants continue to support the intervention                                              | ... assume continuation of at least key aspects of PCC as sustainable in the future OR lack thereof                                                                                                                    |
| <b>Collective action</b>                    | 9. Participants perform the tasks required by the intervention                                    | ... describe adapted practices according to PCC OR lack thereof                                                                                                                                                        |
|                                             | 10. Participants maintain their trust in each other's work and expertise through the intervention | ... show trust in competence and knowledge of involved care professions to deliver PCC as intended OR lack thereof                                                                                                     |
|                                             | 11. The work of the intervention is allocated appropriately to participants                       | ... describe assignments by nursing home management and EPAs regarding study and intervention implementation within the nursing home OR lack thereof                                                                   |
|                                             | 12. The intervention is adequately supported by its host organisation                             | ... illustrate direct support EPAs are receiving by their host organisation (e.g. forwarding of information, disapproving organisational culture or climate, changes in standard operating procedures) OR lack thereof |

| NPT construct and the specific components * |                                                                                       | Definitions for mapping                                                                                                                            |
|---------------------------------------------|---------------------------------------------------------------------------------------|----------------------------------------------------------------------------------------------------------------------------------------------------|
|                                             |                                                                                       | Meaning: Encompasses statements that ...                                                                                                           |
| <b>Reflexive<br/>monitoring</b>             | 13. Participants access information about the effects of the intervention             | ... document measures executed in accordance with the study intervention and resulting effects of intervention components OR lack thereof          |
|                                             | 14. Participants collectively assess the intervention as worthwhile                   | ... illustrate a positive attitude of the care team and deem the intervention as meaningful and reasonable OR lack thereof                         |
|                                             | 15. Participants individually assess the intervention as worthwhile                   | ... illustrate a positive OR negative attitude of the EPAs towards the intervention and whether they would take up the role as an EPA again OR not |
|                                             | 16. Participants modify their work in response to their appraisal of the intervention | ... show a reflection and change of own actions in favour of the intervention or the intention to do so in future OR lack thereof                  |

EPA: Expert for PCC for Older People (practice development champion); NPT: Normalization Process Theory; PCC: person-centred care

---

\* May CR, Finch T, Ballini L, MacFarlane A, Mair F, Murray E et al. Evaluating complex interventions and health technologies using normalization process theory: development of a simplified approach and web-enabled toolkit. BMC Health Serv Res. 2011;11:245.
